# Supplementary material for: Electrolyte-Gated Graphene Field Effect Transistor-Based Ca2+ Detection Aided by Machine Learning
Source: MDPI journal article supplement (doi:10.3390/s23010353), 2022-12-29
Supplement: s1 [file s1]

# Calibration-Free $\text{Ca}^{2+}$ Detection by Lg-GFET Sensor and Machine Learning

In order to evaluate the selectivity of the sensors, we also tested the output and transfer curves after incubation with  $\text{Ba}^{2+}$ ,  $\text{K}^+$ ,  $\text{Mg}^{2+}$  and  $\text{Na}^+$  aqueous solutions (10 mg/L). The responding results are shown in Figure S1, in which  $\Delta I_{ds}/I_{(ds,0)}$  was calculated by using the same method give in the manuscript (section 3.2). It can be seen that there are also responses to  $\text{Ba}^{2+}$ ,  $\text{K}^+$ ,  $\text{Mg}^{2+}$  and  $\text{Na}^+$ , but their  $\Delta I_{ds}/I_{(ds,0)}$  value are relatively lower than  $\text{Ca}^{2+}$ , indicating that the devices have a good selectivity for  $\text{Ca}^{2+}$ .

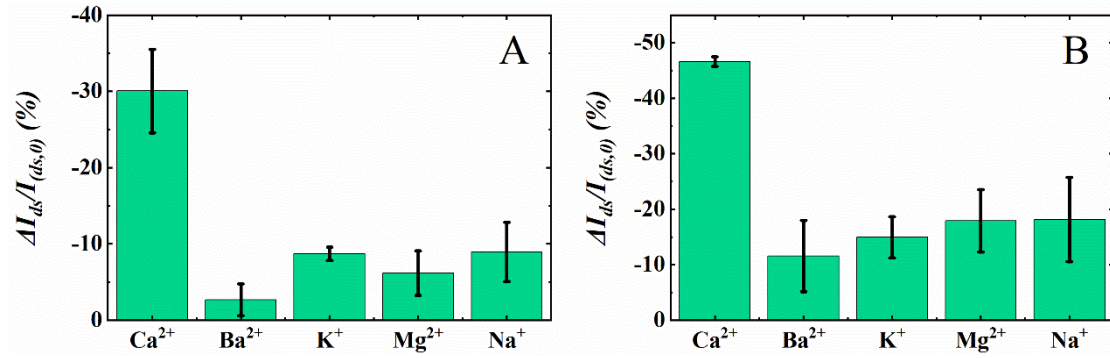

**Figure S1.** The selectivity of the sensor. (A) The calculated  $\Delta I_{ds}/I_{(ds,0)}$  at  $V_{ds}=0.8\text{V}$  on the output curve which measured after  $\text{Ba}^{2+}$ ,  $\text{K}^+$ ,  $\text{Mg}^{2+}$  and  $\text{Na}^+$  solutions dropped. (B) The calculated  $\Delta I_{ds}/I_{(ds,0)}$  at  $V_{CNP}$  on the transfer curve which measured after  $\text{Ba}^{2+}$ ,  $\text{K}^+$ ,  $\text{Mg}^{2+}$  and  $\text{Na}^+$  solutions dropped. The error bar represents the standard deviations (n=4).

The main code of training transfer curve to get LR, SVR, DTR and RFR models was shown in below, the code for training the output curve is similar.

## 1. Divide data set

```
#希望测试集能够代表整个数据集中不同电压时的输入
data["divide"]=pd.cut(data["Vg"],bins=10) #bins取整数，即指定分箱的箱子个数
split=StratifiedShuffleSplit(n_splits=1,test_size=0.2,random_state=42)
for train_index,test_index in split.split(data,data["divide"]):
    strat_train_set=data.loc[train_index]
    strat_test_set=data.loc[test_index]
strat_train_set.to_csv(ml_path+"训练集.csv")
strat_test_set.to_csv(ml_path+"测试集.csv")
print("训练集个数",len(strat_train_set))
print("测试集个数",len(strat_test_set))
#数据集划分完成之后，我们将divide列删除
for set_ in (strat_train_set,strat_test_set):
    set_.drop("divide",axis=1,inplace=True)
#复制数据集
data_process=strat_train_set.copy()
corr_matrix=data_process.corr()
print("各属性之间的相关系数",corr_matrix)
attributes = ["Vg", "IdsChg", "Con"]
# 训练集
data_ml_train_sample=data_process.drop("Con",axis=1)
data_ml_train_target=data_process["Con"].copy()
# 测试集
data_ml_test_sample=strat_test_set.drop("Con",axis=1)
data_ml_test_target=strat_test_set["Con"].copy()
# 打印测试集格式
print("测试集数量: ",len(data_ml_test_sample))
```

## 2. LinearRegression

```
lin_reg=LinearRegression()
lin_reg.fit(data_ml_train_sample,data_ml_train_target)
joblib.dump(lin_reg,ml_path+"transfer_lin_reg.pk1") #保存模型
transfer_lin_reg=joblib.load(ml_path+"transfer_lin_reg.pk1")#加载模型
Lin_Con_Predictions=transfer_lin_reg.predict(data_ml_test_sample)
lin_mse=mean_squared_error(data_ml_test_target,Lin_Con_Predictions)
lin_mae=mean_absolute_error(data_ml_test_target,Lin_Con_Predictions)
lin_r2=r2_score(data_ml_test_target,Lin_Con_Predictions)
MSE["线性mse"]=lin_mse
MAE["线性MAE"]=lin_mae
R2["线性R2"]=lin_r2
print("线性模型",lin_mse)
err=pd.DataFrame()
err[0]=abs(Lin_Con_Predictions-data_ml_test_target)
# 个数统计
x=["0","1","2","3","4","5","6","7",">8"]
num=[]
for i in range (0,9,1):
    num.append(((err[0]>=i)&(err[0]<i+1)).values.sum())
print("num的个数",len(num))
lin_y=[]
for i in num:
    lin_y.append(100*i/len(data_ml_test_sample))
print("lin_y",lin_y)
# color="red" 设置柱子颜色
plt.bar(x,lin_y,align="edge",color="red",alpha=0.5)
plt.xlabel('Abs(error)')
plt.ylabel('Proportion(%)' )
plt.grid(True)
save_fig(sensor+"转移线性模型bar图") #先保存再显示
plt.show()
```

## 3. Support Vector Regression

```
# 支持向量回归
svr_param_grid=[
    {'kernel':['linear','poly','rbf']},
    {'degree':[1,3,5], 'C':[0.1,1,5], 'epsilon':[0.1,0.7,1]}
]
svm_reg=SVR()
svr_grid_search=GridSearchCV(svm_reg,svr_param_grid,cv=5,scoring='neg_mean_squared_error',
                             return_train_score=True)
svr_grid_search.fit(data_ml_train_sample,data_ml_train_target)
print("支持向量回归最合适的参数:",svr_grid_search.best_params_)
joblib.dump(svr_grid_search.best_estimator_,ml_path+"transfer_svr_reg.pk1") #保存模型
transfer_svr_reg=joblib.load(ml_path+"transfer_svr_reg.pk1")#加载模型
svm_reg.Predictions=transfer_svr_reg.predict(data_ml_test_sample)
svm_reg_mse=mean_squared_error(data_ml_test_target,svm_reg.Predictions)
svm_reg_mae=mean_absolute_error(data_ml_test_target,svm_reg.Predictions)
svm_reg_r2=r2_score(data_ml_test_target,svm_reg.Predictions)
MSE["支持向量回归MSE"]=svm_reg_mse
MAE["支持向量回归MAE"]=svm_reg_mae
R2["支持向量回归R2"]=svm_reg_r2
parameter["支持向量回归参数"]=svr_grid_search.best_params_
print("支持向量模型mse",svm_reg_mse)
svm_reg_err=pd.DataFrame()
svm_reg_err[0]=abs(svm_reg.Predictions-data_ml_test_target)
num=[]
count_all=pd.DataFrame()
for i in range (0,9,1):
    element=(((svm_reg_err[0]>=i)&(svm_reg_err[0]<i+1))).values.sum()
    num.append(element)
print("num",num)
svr_y=[]
for i in num:
    svr_y.append(100*i/len(data_ml_test_sample))
print("svr_y",svr_y)
plt.bar(x,svr_y,align="edge",color="orange",alpha=0.5)
plt.xlabel("Abs(error)")
plt.ylabel('Proportion(%)' )
plt.grid(True)
save_fig(sensor+"svr模型bar图") #先保存再显示
plt.show()
print("MSE",MSE)
```

## 4. Decision Tree Regression

```
df=pd.DataFrame()
dtr_param_grid=[
    {'max_depth':[1,5,10], 'min_samples_split': [1,5,10]}]
decision_tree_reg=DecisionTreeRegressor()
dtr_grid_search=GridSearchCV(decision_tree_reg, dtr_param_grid, cv=5, scoring='neg_mean_squared_error',
                             return_train_score=True)
dtr_grid_search.fit(data_ml_train_sample, data_ml_train_target)
print("DTR最适合的参数: ", dtr_grid_search.best_params_)
joblib.dump(dtr_grid_search.best_estimator_, ml_path+"transfer_dtr_reg.pk1") #保存模型
transfer_dtr_reg=joblib.load(ml_path+"transfer_dtr_reg.pk1") #加载模型
decision_tree_Predictions=transfer_dtr_reg.predict(data_ml_test_sample)
decision_tree_mse=mean_squared_error(data_ml_test_target, decision_tree_Predictions)
decision_tree_mae=mean_absolute_error(data_ml_test_target, decision_tree_Predictions)
decision_tree_r2=r2_score(data_ml_test_target, decision_tree_Predictions)
MSE["decision_treemse"]=decision_tree_mse
MAE["决策树MAE"]=decision_tree_mae
R2["决策树R2"]=decision_tree_r2
parameter["决策树回归参数"]=dtr_grid_search.best_params_
df=pd.DataFrame()
df["test_target"]=data_ml_test_target
df["test_predictions"]=decision_tree_Predictions
df.to_csv(ml_path+sensor+"转移曲线决策树回归模型预测结果.csv")
print("决策树回归模型mse:", decision_tree_mse)
err1=pd.DataFrame()
err1[0]=abs(decision_tree_Predictions-data_ml_test_target)
#绘制bar图
num=[]
count_all=pd.DataFrame()
for i in range(0,9,1):
    element=((err1[0]>=i)&(err1[0]<i+1))).values.sum()
    num.append(element)
print("num", num)
dt_y=[]
for i in num:
    dt_y.append(100*i/len(data_ml_test_sample))
print("dt_y", dt_y)
# edgcolor="blue" 设置柱子颜色
plt.bar(x, dt_y, align="edge", color="blue", alpha=0.5)
plt.xlabel("Abs(error)")
plt.ylabel("Proportion(%)")
plt.grid(True)
save_fig(sensor+"决策树模型bar图") #先保存再显示
plt.show()
```

## 5. Random forest regression

```
# 随机森林模型
rf_param_grid=[
    {'min_samples_split': [2,5,10]}]
]
random_forest_reg=RandomForestRegressor()
rfr_grid_search=GridSearchCV(random_forest_reg, rf_param_grid, cv=5, scoring='neg_mean_squared_error', return_train_score=True)
rfr_grid_search.fit(data_ml_train_sample, data_ml_train_target)
print("RFR最适合的参数: ", rfr_grid_search.best_params_)
joblib.dump(rfr_grid_search.best_estimator_, ml_path+"transfer_rfr_reg.pk1") #保存模型
transfer_rfr_reg=joblib.load(ml_path+"transfer_rfr_reg.pk1") #加载模型
forest_reg_Predictions=transfer_rfr_reg.predict(data_ml_test_sample)
forest_reg_mse=mean_squared_error(forest_reg_Predictions, data_ml_test_target)
forest_reg_mae=mean_absolute_error(data_ml_test_target, forest_reg_Predictions)
forest_reg_r2=r2_score(data_ml_test_target, forest_reg_Predictions)
MSE["forest_reg_mse"]=forest_reg_mse
MAE["随机森林MAE"]=forest_reg_mae
R2["随机森林R2"]=forest_reg_r2
parameter["随机森林回归参数"]=rfr_grid_search.best_params_
print("随机森林模型mse: ", forest_reg_mse)
err2=pd.DataFrame()
err2[0]=abs(forest_reg_Predictions-data_ml_test_target)
num=[]
count_all=pd.DataFrame()
for i in range(0,9,1):
    element=((err2[0]>=i)&(err2[0]<i+1))).values.sum()
    num.append(element)
print("num", num)
rf_y=[]
for i in num:
    rf_y.append(100*i/len(data_ml_test_sample)) #
print("rf_y", rf_y)
plt.bar(x, rf_y, align="edge", color="green", alpha=0.5)
plt.xlabel("Abs(error)")
plt.ylabel("Proportion(%)")
plt.grid(True)
save_fig(sensor+"随机森林模型bar图") #先保存再显示
plt.show()
#总结
pd.concat((pd.DataFrame([MSE]), pd.DataFrame([MAE]), pd.DataFrame([R2]), pd.DataFrame([parameter])))
,axis=0).to_csv(ml_path+sensor+"转移曲线四种算法性能总结.csv")
output_result=pd.DataFrame()
output_result=pd.concat((pd.DataFrame(x), pd.DataFrame(lin_y),
pd.DataFrame(svr_y), pd.DataFrame(dt_y), pd.DataFrame(rf_y))), axis=1)
output_result.to_csv(ml_path+"转移曲线误差百分比总结.csv")
```
